# Supplementary material for: The Potential of Surveillance Data for Dengue Risk Mapping: An Evaluation of Different Approaches in Cuba
Source: MDPI journal article supplement (doi:10.3390/tropicalmed8040230), 2023-04-18
Supplement: s1 [file s1]

**Text S1.** Checking for Multicollinearity.

To test for the presence of collinearity among predictors we first fitted a linear model of the form:

$$y_i = \beta_0 + \beta X_i,$$

where  $y_i$  is the cumulative number of cases and the vector of covariates  $X_i$  includes the following indicators from Table 1: proportion of severe cases, times initiating outbreak, case persistence cumulative, maximum monthly Breteau index averaged over the years of the study period, average monthly Breteau index, pupae per house index from the last epidemic year of the study period, population density and locations with high human concentration and mobility.

After fitting this model, we then computed the generalized variance-inflation factors (VIF) for each indicator. The indicator with the highest variance inflation above 10 ( $VIF > 10$ ) was removed and then we repeated this process to retain only the covariates with  $VIF \leq 10$  (Table S1).

Average monthly BI over five years was the indicator with the highest VIF ( $VIF=32.126$ ) in Santiago de Cuba, and the second highest in Cienfuegos ( $VIF=15.082$ ). After removing this covariate, collinearity was resolved in both datasets.

**Table S1.** Variance inflation factor of indicators included in the models as covariates.

| Variables                               | Cienfuegos |                              | Santiago de Cuba |                              |
|-----------------------------------------|------------|------------------------------|------------------|------------------------------|
|                                         | VIF Before | VIF After excluding (AMBI5*) | VIF Before       | VIF After excluding (AMBI5*) |
| Population density                      | 5.699746   | 5.491146                     | 1.72912          | 1.365011                     |
| Locations with high human concentration | 1.685777   | 1.559970                     | 1.725831         | 1.132089                     |
| Maximum monthly Breteau index (BI)      | 8.062243   | 7.118032                     | 20.398597        | 2.342819                     |
| Average monthly BI over five years      | 14.540425  | --                           | 32.125954        | --                           |
| Pupae per House Index                   | 15.082059  | 7.190873                     | 5.194644         | 1.836846                     |
| Proportion of severe cases              | 1.946183   | 1.569980                     | 1.775636         | 1.715571                     |
| Times initiating outbreak               | 5.378435   | 5.178661                     | 1.993382         | 1.481455                     |
| Dengue case persistence                 | 6.179897   | 6.048083                     | 3.17202          | 3.152469                     |

\***AMBI5:** Average monthly BI over five years

**Table S2.** Structure and description of the models implemented in this study for dengue risk mapping.

| Model                                                                                                                                               | Type        | Parameter inference method  | Abbreviations   | Parameters <sup>g</sup> |
|-----------------------------------------------------------------------------------------------------------------------------------------------------|-------------|-----------------------------|-----------------|-------------------------|
| 1.Generalized linear model <sup>a</sup><br>(Agresti, Allan, 2013)                                                                                   | Non spatial | Bayesian Maximum Likelihood | FIXED.EFF (GLM) | $\beta$                 |
| 2.Independent, GLMM <sup>b</sup><br>(Besag, Julian et al.,1991)                                                                                     | Non spatial | Bayesian                    | IID             | $\beta, v_i$            |
| 3.Intrinsic Conditional Autoregressive <sup>c</sup><br>(Besag, Julian et al.,1991)                                                                  | Spatial     | Bayesian                    | ICAR            | $\beta, u_i$            |
| 4.Besag, York and Mollié model <sup>d</sup><br>(Besag, Julian et al.,1991)                                                                          | Spatial     | Bayesian                    | BYM             | $\beta, v_i, u_i$       |
| 5. Leroux <sup>e</sup> (Leroux, Brian G et al.,2000)                                                                                                | Spatial     | Bayesian                    | LEROUX          | $\beta, u_i, \rho$      |
| 6. Spatial Lag Model <sup>f</sup><br>(Cliff and Ord, 1973; Ord, 1975; Bivand, 1984; Anselin, 1988; LeSage and Pace, 2009; Gómez-Rubio et al.,2015.) | Spatial     | Bayesian                    | SLM             | $\beta, v_i, \rho$      |

<sup>a</sup> Poisson regression:  $y_i|\theta_i \sim \text{Poisson}(\mu_i = E_i\theta_i), \log(\mu_i) = \log(E_i) + \beta_0 + \beta X_i$

<sup>b</sup> Poisson Mixed Effect Independent Model:  $y_i|\theta_i \sim \text{Poisson}(\mu_i = E_i\theta_i), \log(\mu_i) = \log(E_i) + \beta_0 + \beta X_i + v_i, v_i \sim N(0, \tau_v^2)$

<sup>c</sup> Poisson Intrinsic Conditional Autoregressive spatial model:  $y_i|\theta_i \sim \text{Poisson}(\mu_i = E_i\theta_i), \log(\mu_i) = \log(E_i) + \beta_0 + \beta X_i + Zu_i + e, u \sim N(0, \sigma_u^2 \Sigma), \Sigma^{-1} = \text{diag}(N_i) - W$ .

<sup>d</sup> Poisson Besag, York and Mollié Spatial Model:  $y_i|\theta_i \sim \text{Poisson}(\mu_i = E_i\theta_i), \log(\mu_i) = \log(E_i) + \beta_0 + \beta X_i + u_i + v_i, v_i \sim N(0, \tau_v^2), u \sim N(0, \sigma_u^2 \Sigma), \Sigma^{-1} = \text{diag}(N_i) - W$ .

<sup>e</sup> Leroux Spatial Model:  $y_i|\theta_i \sim \text{Poisson}(\mu_i = E_i\theta_i), \log(\mu_i) = \log(E_i) + \beta_0 + \beta X_i + Zu_i, u \sim N(0, \sigma_u^2 \Sigma), \Sigma^{-1} = \frac{1}{\tau} \left( I_n - \frac{\rho}{\lambda_{\max}} C \right) = \frac{1}{\tau} ((1 - \rho)I_n + \rho M)$ .

<sup>f</sup> Spatial Lag Model:  $y_i|\theta_i \sim \text{Poisson}(\mu_i = E_i\theta_i), \log(\mu_i) = (I - \rho W)^{-1}(\beta X + e) + \log(E_i), e \sim N(0, \sigma^2 I)$

<sup>g</sup>  $\beta$ = regression coefficients for fixed effect;  $v_i$ =region-specific random effect;  $u_i$  = spatial random effect; parameter  $\rho \in (0,1)$  specifies the degree of spatial dependency. Other variables used in the models:  $y_i$ = observed dengue cases number in the  $i$ -th area;  $X_i$  the vector of predictors for area  $i$ ;  $\mu_i$  = mean parameter of the Poisson distribution;  $E_i$  = expected count of disease in the  $i$ th area (offset);  $\theta_i$  represents disease risk in spatial unit  $i$ , also known as the standardized incidence ratio (SIR) in CP  $i$ .  $W$  is the spatial weight matrix. The indicators used as predictors ( $X_i$ ) were: proportion of severe cases, times initiating outbreak, case persistence, maximum monthly Breteau index averaged over the years of the study period, average monthly Breteau index, pupae per house index from the last epidemic year of the study period, population density and locations with high human concentration and mobility.
